# Supplementary material
Source: MDPI journal article supplement (https://www.mdpi.com/2073-4344/9/11/898)
Supplement: s1 [file s1]

# Supplementary material

## Positive effects of impregnation of Fe-oxide in mesoporous Al-oxides on the decontamination of dimethyl methylphosphonate

*Tae Gyun Woo<sup>1</sup>‡, Byeong Jun Cha<sup>1</sup>‡, Young Dok Kim<sup>1</sup>\*, and Hyun Ook Seo<sup>2</sup>\**

<sup>1</sup> Department of Chemistry, Sungkyunkwan University, Suwon, 16419, Republic of Korea

<sup>2</sup> Department of Chemical and Energy Engineering, Sangmyung University, Seoul, 03016 Republic of Korea

\*Corresponding authors.

E-mail address: ydkim91@skku.edu (Y.D. Kim), hyun.ook.seo@smu.ac.kr (H.O. Seo)

‡Authors contributed equally to this work.

# Figure S1

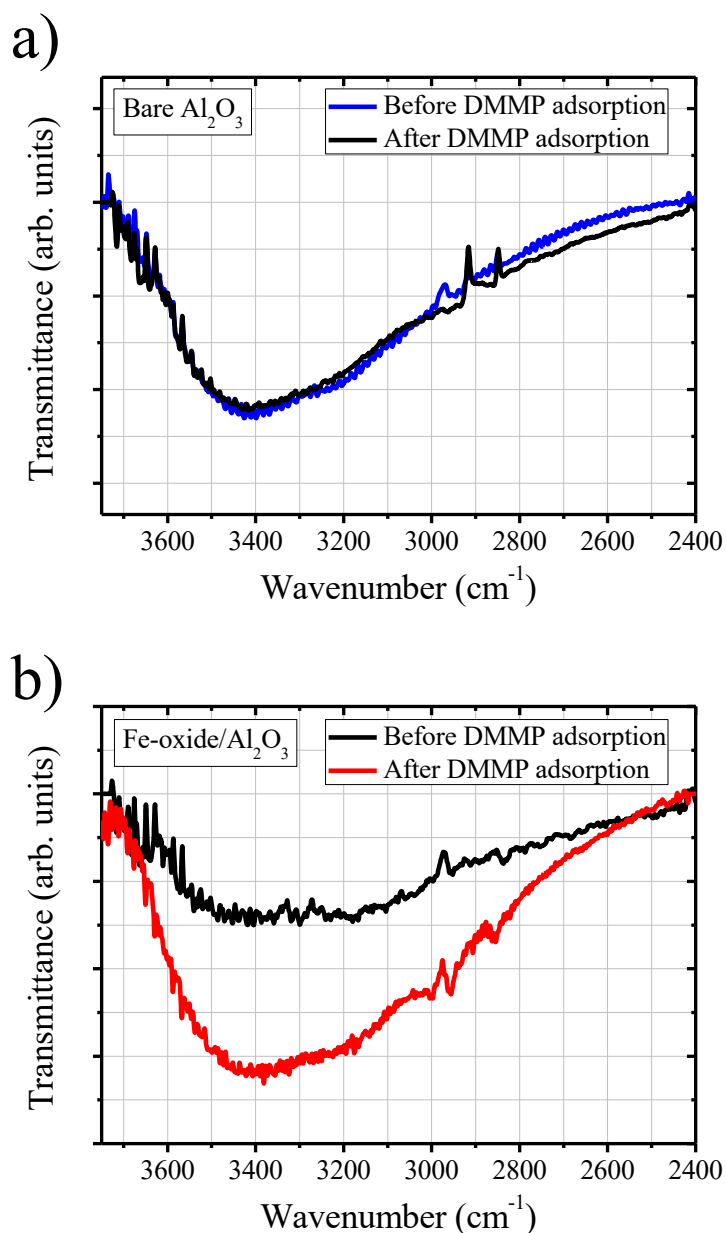

**Figure S1.** Background subtracted FT-IR spectra of a) bare  $\text{Al}_2\text{O}_3$  and b) Fe-oxide/ $\text{Al}_2\text{O}_3$  before and after 360 min of DMMP exposure at room temperature.

# Figure S2

a)

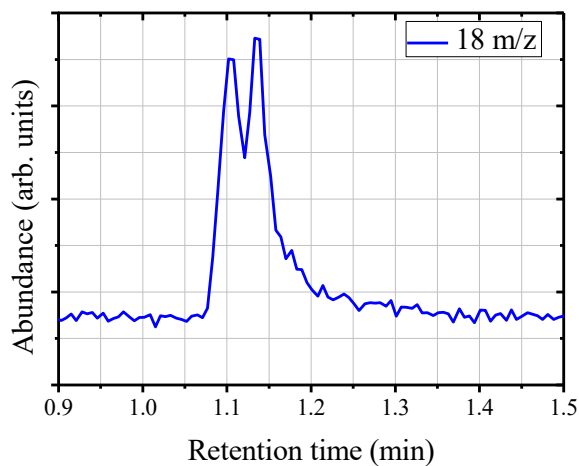

b)

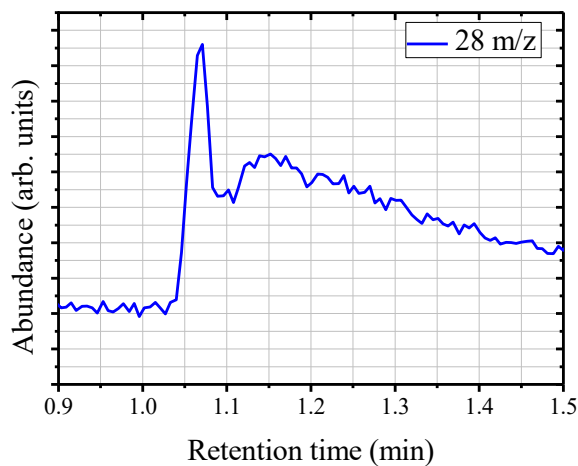

c)

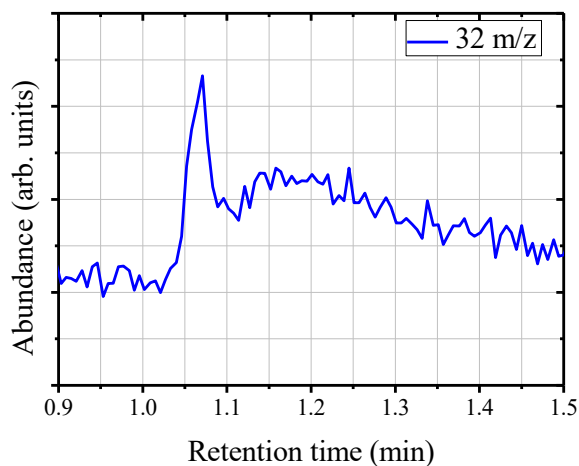

d)

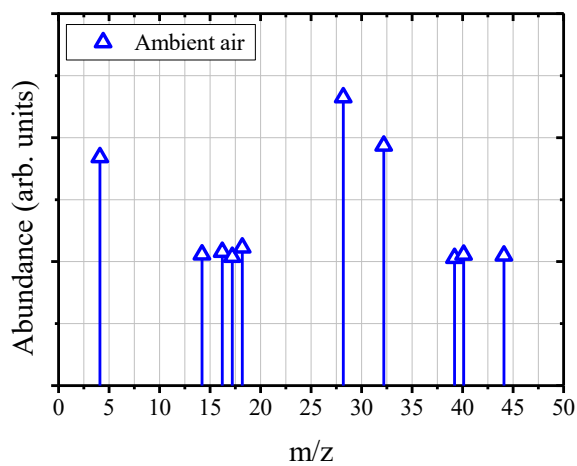

**Figure S2.** GC/MS signals corresponding to a) 18 m/z ( $\text{H}_2\text{O}$ ), b) 28 m/z ( $\text{N}_2$ ), and c) 32 m/z ( $\text{O}_2$ ) in the retention time range of 1.0 to 2.0 min measured with Fe-oxide/ $\text{Al}_2\text{O}_3$ . d) Mass spectrum measured by injection of SPME fiber exposed to ambient air.

# Figure S3

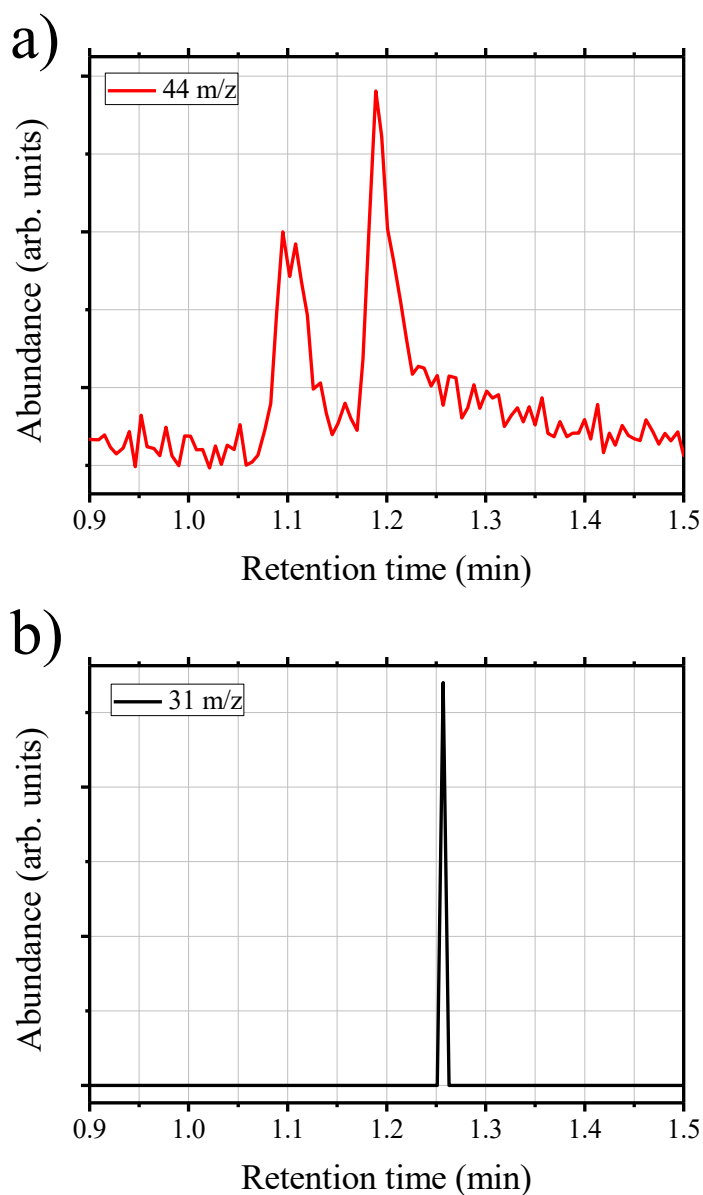

**Figure S3.** GC/MS signal corresponding to a) 44 m/z ( $\text{CO}_2$ ) and b) 31 m/z (ethanol) in the retention time range of 1.0 to 2.0 min measured with bare  $\text{Al}_2\text{O}_3$ .
